# Supplementary material for: Deconvolution of Blood Microarray Data Identifies Cellular Activation Patterns in Systemic Lupus Erythematosus
Source: PLoS One. 2009 Jul 1;4(7):e6098. doi: 10.1371/journal.pone.0006098 (PMC2699551; doi:10.1371/journal.pone.0006098)
Supplement: Table S2 — Expression data for the basis probesets for the main clinical test cohort of SLE patients and healthy controls. (0.31 MB XLS) [file pone.0006098.s002.xls]

group	242904_x_at	232165_at	201369_s_at	233127_at	204621_s_at	202861_at	222862_s_at	235213_at	235739_at	231798_at	200664_s_at	240452_at	236907_at	204622_x_at	227307_at	227641_at	201367_s_at	234408_at	216876_s_at	234362_s_at	221331_x_at	211856_x_at	219179_at	221165_s_at	235150_at	235616_at	227262_at	226913_s_at	211861_x_at	231794_at	216901_s_at	220892_s_at	208193_at	243940_at	215332_s_at	209840_s_at	205758_at	207979_s_at	209841_s_at	227915_at	207232_s_at	234427_at	226423_at	208406_s_at	217119_s_at	242628_at	201414_s_at	227552_at	241871_at
Normal WBC	124.82	36.18	3629.02	225.175	26.115	60.165	251.84	644.51	692.4	546.9	440.215	1134.31	1180.21	145.41	1220.3	1345.795	1295.6	214.17	6.745	402.705	160.2	130.765	167.755	236.48	326.41	356.04	1025.46	55.38	15.8	521.645	115.275	363.735	68.615	109.645	312.11	500	1628.38	841.83	640.915	27.745	28.945	15.4	935.165	195.095	78.715	262.535	859.005	1423.345	430.575
Normal WBC	40.085	107.63	1881.355	198.895	90.155	264.425	758.485	755.435	303.265	536.7	644.78	927.5	783.805	56.37	1316.475	1229.435	946.765	199.77	6.41	404.38	126.29	105.545	109.725	132.43	329.465	177.88	938.265	39.245	62.495	292.62	137.23	217.255	168.06	149.405	356.32	532.1	1233.855	1023.745	882.185	73.045	15.755	38.845	1434.625	197.195	61.495	183.71	894.3	1361.19	416.88
Normal WBC	30.995	73.47	2666.67	147.51	46.15	29.58	843.645	2559.485	497.86	540.2	752.805	804.025	1706.725	210.145	1201.41	2153.62	1315.12	20.575	43.69	679.325	138.835	221.705	128.395	187.42	400.37	344.07	947.18	85.525	87.645	653.345	143.835	213.77	29.12	374.83	346.47	383.73	1906.755	1330.49	865.065	78.025	76.475	20.16	1273.875	37.71	183.315	392.585	982.09	811.18	227.655
Normal WBC	52.975	59.305	2740.785	85.72	31.625	80.555	152.225	1293.99	619.98	424.605	554.485	729.665	1255.245	120.905	1214.23	1541.305	1658.355	39.88	8.97	695.005	167.51	203.54	154.145	370.015	325.535	421.98	867.115	46.045	115.49	434.225	216.105	164.375	161.72	111.29	24.57	320.165	1227.38	592.31	624.48	27.735	35.365	44.365	1013.19	271.975	133.49	297.64	1125.63	1202.66	583.36
Normal WBC	89.765	60.905	2887.535	220.355	27.78	388.145	299.78	1784.29	602.175	328.15	867.7	811.265	2328.885	86.375	808.035	1340.12	1494.345	381.53	3.565	362.38	106.4	127.275	110.76	175.02	134.335	249.105	1062.36	37.5	80.13	656.265	98.135	365.885	43.895	176.345	161.505	449.615	870.275	652.385	617.595	40.895	9.64	48.95	904.495	143.42	41.82	438.605	887.905	792.945	385.13
Normal WBC	104.505	39.82	3158.93	8.905	81.4	314.48	425.2	1997.35	623.935	552.285	883.485	749.305	1934.355	130.135	1391.84	1296.15	1695.84	41.015	1.89	590.645	133.4	197.925	134.535	159.015	196.075	375.55	1207.775	191.745	90.375	496.475	186.49	139.58	7.165	169.14	188.29	241.53	790.97	645.565	575.765	40.73	71.13	31.7	1618.415	250.565	145.62	341.545	783.995	1336.675	647.395
Normal WBC	176.855	115.15	1450.84	188.98	56.58	49.375	84.27	1713.805	1068.515	589.03	952.14	744.59	2533.86	178.71	937.23	1091.555	1468.345	111.43	26.7	610.37	157.34	347.95	210.335	233.93	478.575	326.425	953.725	44.22	125.73	369.725	311.8	260.47	112.8	190.365	387.695	414.605	1723.685	604.99	573.83	28.48	80.99	181.155	1015.88	364.865	92.015	327.1	873.315	861.715	325.575
Normal WBC	47.25	57.255	2808.555	163.28	25.765	49.535	763.185	1017.675	583.795	616.83	1030.425	1033.435	1303.06	139.365	1286.56	1496.31	2173.83	154.18	7.9	564.205	328.74	216.66	184.135	254.675	589.57	395.485	1269.425	40.975	236.345	424.315	386.985	473.41	112.965	154.175	125.73	468.325	1057.685	819.495	762.915	34.73	16.85	98.015	1166.33	99.62	79.43	244.275	1161.77	1409.795	404.16
Normal WBC	231.265	50.695	2430.22	122.18	58.135	28.295	473.61	1292.435	706.44	682.885	872.725	775.825	1770.86	129.695	560.565	961.35	1438.795	149.705	7.94	379.915	78.895	330.06	138.905	186.29	764.99	357.2	985.52	60.855	225.575	120.06	364.225	336.785	54.66	208.42	295.15	336.945	2385.99	1207.57	665.135	51.805	43.175	53.115	904.865	108.19	182.735	271.38	906.33	986.03	433.405
Normal WBC	207.76	236.435	3538.445	90.545	63.695	139.13	681.795	1304.33	455.625	732.415	870.855	781.685	1242.945	100.2	1641.085	1111.26	2518.705	23.055	3.09	498.225	136.52	154.5	183.21	237.73	394.195	378.955	987.16	60.085	116.065	250.875	289.105	302.01	40.8	20.16	197.635	334.595	1226.925	675.53	511.845	41.645	39.66	61.685	839.275	279.065	87.17	242.93	1147.93	1320.92	296.49
Normal WBC	434.11	19.905	2644.005	16.59	201.74	200.64	85.08	1612.425	1663.02	766.565	1032.705	752.09	5853.545	116.29	848.655	894.22	974.515	133.235	2.48	463.71	179.095	225	149.22	78.33	476.34	305.12	767.86	44.26	126.775	177.465	109.34	163.275	128.825	22.41	151.355	208.85	867.825	561.525	576.455	50	33.06	188.075	1169.685	416.35	26.16	316.975	659.405	1251.57	138.565
Normal WBC	146.125	52.32	2990.445	24.525	14.41	302.32	462.075	1073.02	313.255	754.69	744.565	741.025	1407.54	87.67	860.705	1442.325	1117.19	114.54	8.83	645.855	193.98	191.93	182.875	55.155	158.01	136.165	1055.875	75.62	110.535	331.195	166.58	262.785	100.775	157.735	259.385	289.615	1458.505	834.695	551.315	20.96	76.49	177.92	1409.525	473.325	142.295	400.41	1079.425	2178.445	722.15
Normal WBC	208.905	23.62	2682.875	84.11	33.785	60.045	489.94	2411.635	883.385	576.485	643.475	817.27	2345.895	196.325	1363.64	1461.825	1509.22	140.78	8.2	552.23	220.105	167.405	270.57	271.455	353.4	637.28	1330.815	66.66	128.99	313.205	135.385	321.88	122.87	126.375	266.78	618.69	1928.35	993.985	999.88	75.815	90.935	53.6	706.87	126.63	91.675	296.26	1114.885	1450.185	422.405
Normal WBC	88.48	255.26	2798.75	114	8.915	127.625	854.52	2579.435	400.285	905.755	605.95	912.825	1740.325	148.215	1195.4	1342.47	1260.75	35.35	9.215	392.995	192.63	190.055	194.71	172.13	123.505	324.105	1092.255	19.865	72.3	426	85.215	133.31	74.165	164.91	354.62	571.44	1816.075	1210.05	1162.695	31.725	67.065	79.285	988.825	176.29	46.315	299.8	1071.745	1460.82	538.855
Normal WBC	291.255	67.005	3376.56	61.37	103.745	46.315	408.89	1155.815	748.49	446	809.45	677.055	1091.375	268.33	1546.155	962.535	1779.685	25.645	10.76	584.075	257.545	237.47	221.29	173.38	136.575	348.88	1098.61	28.055	138.8	448.195	210.07	161.605	15.23	185.065	315.87	286.145	1610.195	923.075	521.095	26.365	148.955	108.53	1112.895	282.72	89.62	371.805	1033.685	1448.5	137.275
Normal WBC	316.94	236.73	3275.99	143.475	369.395	158.34	552.185	1186.98	1815.83	317.655	1052.61	363.115	1624.255	322.765	870.6	1099.79	2297.03	25.93	34.33	353.56	258.585	305.67	193.475	211.675	430.08	379.785	697.69	83.855	106.605	327.92	196.865	40.545	18.73	147.23	66.295	355.08	922.51	816.845	832.305	66.94	16.09	24.75	859.94	233.715	115.645	398.975	1095.215	757.11	436.435
Normal WBC	85.175	33.98	3168.15	86.02	48.155	73.985	502.085	1608.835	668	252.19	683.27	633.575	1452.9	175.75	1525.53	1395.01	1826.35	264.145	11.21	426.775	332.44	341.435	319.28	167.195	104.73	350.67	798.9	68.435	91	494.985	183.025	368.22	89.735	221.105	290.02	758.34	889.34	738.415	1263.59	65.16	49.565	103	835.71	193.78	49.7	141.47	967.595	1196.67	334.63
Normal WBC	233.515	292.85	3029.29	66.545	51.5	148.345	369.245	1809.095	726.525	555.275	920.765	646.28	2095.12	82.43	571.305	862.435	1911.935	179.025	5.26	458.555	18.01	270.215	45.34	178.36	84.57	273.125	856.925	61.8	137.96	471.61	236.92	319.56	57.835	179.05	106.885	565.31	675.625	749.825	608.195	42.365	75.325	58.92	1078.95	350.7	110.585	587.335	949.6	1092.12	341.74
Normal WBC	202.19	23.385	1070.11	23.175	17.755	171.27	535.615	352.305	322.485	268.18	441.245	765.78	704.165	161.365	1053.395	1272.765	310.27	161.43	6.73	683.48	159.435	118.225	18.275	181.73	87.585	202.25	964.275	19.2	132.86	417.765	99.78	298.73	57.01	116.905	282.82	65.4	3182.19	1756.165	255.285	92.925	74.53	228.97	1939.11	75.235	364.485	334.385	910.53	1774.005	508.2
Normal WBC	101.045	47.665	2059.24	62.6	50.22	50.955	385.295	1881.795	655.09	996.715	848.52	468.325	2508.625	108.305	1177.025	1180.885	1506.15	119.065	2.415	731.58	244.665	316.99	228.035	188.595	551.915	683.67	1175.22	62.515	197.72	512.535	238.85	223.185	103.545	165.675	511.475	624.935	3111.14	2149.11	1280.72	28.84	28.13	258.29	1618.12	333.22	166.69	240.125	951.675	1662.565	860.455
Normal WBC	87.48	130.49	1465.425	239.465	9.435	293.77	832.855	3152.605	768.14	887.79	991.9	884.47	1751.195	86.695	1254.3	1333.075	568.42	35.36	3.085	701.495	231.37	252.74	158.75	140.04	67.13	209.905	1200.14	76.67	133.55	331.53	220.66	340.94	33.24	133.625	357.11	703.995	1572.975	1816.075	1566.2	28.275	52.04	134.03	1239.82	312.15	168.28	160.115	1177.52	1403.41	605.09
Normal WBC	139.26	27.865	2489.775	114.86	13.3	236.3	404.535	2387.105	781.825	326.68	903.095	762.28	2448.61	107.755	1266.95	1050.365	1039.285	65.28	3.315	679.76	99.86	163.91	135.6	210.4	134.205	41.305	877.535	48.265	91.18	438.955	88.01	211.795	28.36	350.81	143.9	436.755	817.005	706.355	676.685	20.405	71.615	161.225	1258.8	188.605	18.22	344.505	641.57	836.955	396.77
Normal WBC	115.895	163.45	2994.27	141.56	14.52	168.785	132	664.11	501.995	429.205	707.64	859.64	690.585	169.325	1620.585	1201.55	2032.26	133.775	1.925	739.71	162.45	260.445	199.2	233.805	350.97	467.575	813.8	31.59	128.195	531.7	204.615	337.81	40.895	227.39	185.64	341.72	1295.205	766.305	626.345	26.765	105.03	17.17	1014.16	166.72	105.65	249.7	1096.315	1094.395	205.135
Normal WBC	996.885	19.275	1606.51	183.5	487.855	243.97	350.87	1363.435	2225.93	338.74	801.935	271.085	3105.28	363.5	560.905	1141.785	195.68	281.145	9.035	412.96	61.545	99.335	154.25	373.985	45.55	400.365	941.28	46.015	148.245	437.7	224.21	277.795	165.95	331.82	229.725	305.245	558.58	507.73	667.3	236.35	21.115	42.755	857.54	26.065	17.565	185.86	648.405	894.76	330.445
Normal WBC	432.605	18.335	2426.09	193.935	42.465	132.635	385.755	1809.46	902.925	459.905	919.64	547.05	3525.015	101.675	1268.51	1152.55	1613.675	42.84	17.25	678.205	93.22	166.35	74.235	171.095	114.025	116.28	1048.97	26.97	154.165	318.815	114.615	187.985	30.145	145.36	137.8	287.11	1203.57	605.69	493.315	47.1	19.445	142.94	1474.72	168.225	99.18	227.735	854.8	1328.855	444.405
Normal WBC	37.17	98.94	3862.615	171.275	21.585	425.135	1088.74	1645.315	411.87	992.835	1572.64	1446.68	429.81	61.745	1694.09	1637.965	2553.42	76.165	11.43	755.945	170.485	321.55	17.93	277.8	929.33	484.75	916.515	20	147.735	644.21	945.71	161.505	4.79	119.505	374.405	685.05	3375.56	1291.205	800.865	64.54	341.35	248.4	1808.875	898.87	312.02	471.855	1442.205	1377.82	492.985
Normal WBC	10.88	314.46	3453.585	145.6	49.005	192.56	744	1625.49	554.295	592.705	889.595	1617.815	606.68	143.61	1798.155	1577.58	1608.29	39.38	6.6	616.635	136.515	358.175	96.775	170.845	441.14	603.975	1205.915	11.27	195.115	400.755	188.88	45.825	30.52	236.125	332.36	288.87	1935.3	1514.16	380.2	35.525	93.795	151.4	1426.935	535.38	244.375	454.415	843.665	2016.425	429.53
Normal WBC	63.425	76.085	2799.59	19.84	8.975	223.885	401.06	1309.51	427.17	854.445	756.595	1272.685	779.48	141.265	1290.655	1542.275	1855.295	46.645	7.315	375.755	183.295	299.86	140.595	200.645	311.505	231.615	1140.43	19.795	156.215	475.92	225.865	266.135	141.005	225.785	279.38	892.845	2060.825	1696.485	1224.335	28.555	17.415	234.74	1642.18	389.96	126.485	298.705	1280.455	1565.215	491.725
Normal WBC	171.91	200.475	2727.255	77.2	62.34	161.155	988.945	1735.18	273.025	993.405	1131.265	1069.905	1954.455	98.42	1572.24	2168.405	1957.5	64.96	8.99	497.07	133.46	305.695	176.74	180.13	512.57	314.93	1186.08	49.39	153.875	382.84	877.545	244.54	111.485	147.38	300.305	481.17	1334.205	1592.645	576.015	21.735	30.245	268.445	2263.275	438.18	145.495	125.78	1236.42	1639.22	560.145
Normal WBC	119.185	19.835	1896.61	130.22	23.98	107.17	819.065	2482.26	692.54	1097.085	909.21	948.18	2901.42	151.155	1576.255	1781.75	1655.245	204.905	3.56	622.07	185.03	362	312.285	211.345	476.695	312.64	1005.36	102.84	276.07	279.16	442.095	282.635	66.855	270.985	296.49	556.62	1204.98	1004.685	809.29	33.34	17.96	313.795	1779.63	449.64	141.52	225.155	1260.41	1573.65	501.05
Normal WBC	225.885	98.875	3149.605	66.295	22.78	195.565	471.33	1807.19	504.46	497.055	734	1206.39	1027.515	90.315	1784.595	1835.805	2315.98	41.805	2.04	564.58	73.33	363.36	180.705	212.07	758.26	310.38	1020.39	20.505	247.515	294.535	320.665	193.125	113.38	241.94	249.33	339.345	1618.07	1176.86	560.79	22.965	50.83	69.76	1419.74	584.12	214.69	217.94	1201.215	1289.535	433.58
Normal WBC	161.035	155.22	2665.265	179.46	14.45	248.775	227.375	2237.625	293.4	442.085	1197.89	1009.025	789.79	95.975	1661.135	1603.755	1912.945	286.36	4.24	477.67	243.535	298.02	135.555	257.095	422.175	278.545	1012.17	71.725	248.945	278.165	420.755	286.17	42.98	206.22	245.22	539.575	1526.23	1071.035	674.9	107.475	99.885	78.055	1597.38	479.515	146.605	433.55	1106.135	1849.775	393.56
Normal WBC	151.05	28.26	2287.085	243.23	19.7	308.57	984.475	2097.34	651.59	901.5	1003.755	1056.475	2229.475	83.89	1565.565	2202.445	2191.2	146.245	4.855	635.245	272.915	346.585	310.955	318.825	523.08	374.46	1545.325	73.81	243.715	476.505	427.835	396.285	61.695	48.665	243.585	831.22	1314.585	1652.35	1267.915	32.14	35.09	57.06	1437.11	483.35	153.6	362.58	1269.745	1494.16	666.715
Normal WBC	127.44	29.27	2722.655	209.13	34.95	210.415	1040.095	1833.135	518.26	630.655	623.875	913.17	1088.525	128.06	1721.53	1563.2	2345.51	38.775	40.165	407.72	111.725	199.74	160.795	268.365	713.88	365.15	1249.5	34.775	211.98	412.295	420.19	236.5	83.73	142.81	364.965	447.245	1366.02	1168.055	682.205	34.73	35.155	39.65	1666.05	635.055	221.745	328.715	925.65	1627.81	323.265
Normal WBC	170.705	27.39	3082.42	94.65	49.295	268.905	714.21	1951.795	344.2	257.59	796.09	880.96	1410.405	109.13	2256.345	3163.675	2087.365	14.6	11.215	551.62	182.935	580.45	193.685	192.52	728.36	693.83	1257.065	62.005	330.455	362.45	497.85	217.795	143.595	172.025	479.9	1343.665	2873.935	1791.055	1614.275	35.645	77.685	161.6	1364.02	511.37	182.29	269.565	1131.78	1604.685	517.07
Normal WBC	73.185	74.32	3069.195	164.12	38.835	293.205	479.29	1489.29	651.645	734.105	730.195	968.01	2106.51	126.75	1150.1	1313.61	2025.23	46.885	13.665	795.595	133.595	355.195	178.34	291.185	598.515	431.21	1263.65	14.345	172.01	433.82	391.505	298.625	78.765	192.7	269.51	622.59	1755.37	1365.415	831.655	31.36	42.675	129.835	1745.23	584.89	142.965	227.42	1296.155	1224.185	566.865
Normal WBC	488.32	36.335	3771.96	100.54	228.065	337.955	273.295	1445.82	1770.875	55.605	802.915	555.06	1505.835	204.595	423.4	1733.875	1276.085	167.74	10.125	619.125	182.815	172.745	109.42	181.49	358.75	338.78	944.47	21.96	113.315	528.64	90.56	157.145	15.315	190.635	151.3	212.775	1700.215	714.82	245.67	36.29	46.55	65.58	1487.925	26.875	169.49	146.14	887.055	1658.89	331.345
Normal WBC	224.78	24.9	2124.255	40.87	141.315	180.58	888.495	1766.29	941.77	567.22	639.12	491.305	2543.585	194.01	1367.695	1555.48	1334.87	181.425	4.65	959.905	42.825	196.41	194.945	189.845	391.75	376.71	1109.36	54.525	150.685	215.595	180.945	281.43	14.495	112.165	105.79	241.775	758	350.115	283.81	41.395	30.3	23.615	1528.51	17.205	129.915	189.86	788.065	1053.2	359.195
Normal WBC	182.64	42.735	2402.515	43.185	71.295	114.135	228.255	1578.57	607.165	327.17	714.12	308.46	1237.945	40.895	1253.01	1031.41	1505.335	32.765	2.81	435.065	135.29	143.115	157.15	85.485	573.385	528.56	967.225	11.955	79.095	279.175	150.255	118.49	38.295	123.53	140.34	181.265	731.63	490.275	290.845	41.515	52.67	36.205	1188.495	119.675	106.025	96.265	535.875	745.255	336.595
Normal WBC	328.87	58.15	2556.8	104.41	245.48	394.4	81.385	1680.35	1655.385	178.575	1090.53	590.93	2147.72	267.69	1145.79	1505.63	1571.275	120.045	5.555	679.64	146.795	190.21	96.125	154.48	527.1	535.125	921.03	21.41	33.22	541.23	397.93	227.505	65.24	139.695	336.115	94.83	6160.34	2315.07	226.15	320.94	15.89	34.27	1160.995	140.89	149.89	284.66	780.295	1727.82	304.42
Normal WBC	248.96	33.55	2237.395	99.355	188.16	152.795	62.115	1977.3	1388.255	58.815	865.54	456.9	1184.67	210.05	1126.39	1086.97	1755.31	180.315	3.57	894.625	190.05	248.32	126.165	125.01	444.59	353.365	1083.775	14.075	162.86	259.465	423.805	240.98	61.055	156.61	200.005	156.66	2430.25	1001.395	197.82	38.03	21.965	210.52	1113.52	127.46	131.845	409.135	1153.73	1297.785	416.36
Normal WBC	115.19	21.06	2791.035	17.245	256.805	172.43	780.93	1527.715	1619.265	481.94	514.93	502.765	2479.185	232.815	1043.675	1372.465	1199.84	148.42	2.765	499.08	43.045	117.15	193.495	110.445	209.015	232.9	1091.63	75.355	117.745	369.235	135.32	149.285	12.67	202.05	144.67	114.005	531.945	301.46	176.345	51.605	36.005	43.89	989.82	132.02	68.02	132.085	603.805	990.495	242.775
Normal WBC	255.365	90.94	2622.095	46.89	270.35	203.01	353.745	1885.615	1571.91	453.045	944.085	906.02	2292.115	258.505	1067.03	1335.095	1709.785	246.04	5.34	698.33	147.71	271.73	125.93	135.39	484.265	475.77	1088.135	30.48	143.03	408.525	262.36	215.72	10.17	38.615	182.13	179.31	1302.725	614.265	283.2	57.65	36.895	63.91	1176.44	168.94	187.185	163.31	814.12	852.785	302.16
Normal WBC	183.405	36.29	2352.63	75.59	150.32	364.71	240.54	1310.07	1148.79	245.2	1011.705	466.775	1833.24	237.58	1144.38	1284.755	1939.825	142.19	3.035	584.975	132.755	191.625	141.65	129.01	770.425	235.145	620.925	19.365	81.555	449.99	587.37	207.235	8.415	174.475	308.945	223.545	2295.715	1186.25	274.93	22.79	62.505	31.99	1104.07	19.445	102.015	265.27	700.36	1103.855	324
Normal WBC	32.65	19.2	2857.115	77.685	50.61	331.415	306.62	1303.48	838.15	356.85	870.825	505.795	1176.59	174.865	654.645	897.045	2297.975	82.535	11.44	660.365	139.575	246.175	121.735	150.135	531.795	183.77	892.185	15.695	62.33	381.36	422.41	208.36	15.93	228.43	180.13	253.315	1705.445	790.07	406.965	22.555	26.475	28.715	1657.765	63.505	177.715	223.265	846.16	1616.39	274.55
Normal WBC	400.675	35.165	2865.855	12.55	218.285	419.57	736.57	889.715	931.59	147.36	999.82	316.315	1622.215	237.23	876.435	897.495	2010.235	143.105	3.415	560.415	152.045	146.715	79.085	135.595	578.72	477.34	1192.475	54.19	98.435	414.42	450.445	137.115	9.47	28.055	122.41	109.535	1823.38	887.915	174.735	21.535	112.195	89.17	1091.88	230.025	135.97	150.33	744.28	964.875	219.115
WBC from lupus	298.655	26.345	2060.175	29.725	121.105	1032.305	309.29	128.1	1505.605	295.83	964.255	272.545	1174.9	318.265	842.475	1260.875	730.34	379.28	10.95	536.995	160.51	32.17	96.44	258.68	145.8	357.795	883.54	29.495	106.155	687.07	8.865	178.665	100.575	40.14	126.35	376.71	956.17	441.16	326.445	105.965	38.335	24.87	421.575	288.435	60.385	189.69	754.45	1024.5	209.055
WBC from lupus	697.08	56.075	2430.65	123.27	25.735	569.95	625.73	152.375	805.385	288.72	1160.595	372.315	965.71	214.08	144.925	1174.675	488.99	266.69	8.5	25.895	113.16	174.215	195.555	133.285	267.025	200.205	853.595	26.105	14.75	112.755	33.61	191.285	140.44	185.75	104.2	204.63	1041.9	550.575	360.46	39.22	15.62	125.425	609.315	16.995	41.705	154.415	526.73	692.325	26.77
WBC from lupus	317.845	30.9	2251.02	208.41	14.38	41.045	96.12	410.345	749.775	315.145	566.44	726.96	710.19	198.93	1205.78	1503.52	298.5	160.19	31.26	616	251.995	32.33	88.19	99.61	241.185	357.44	983.575	72.755	69.095	258.99	75.685	295.4	147.835	41.57	244.895	262.215	1117.785	685.31	410.67	291.11	46.725	193.4	1135.01	43.19	77.015	316.255	772.17	1162.48	284.79
WBC from lupus	231.475	55.95	2654.225	83.76	156.56	556.745	252.915	373.555	648.315	544.065	763.96	685.88	413.67	276.77	574.28	1330.94	695.965	331.785	5.795	268.795	21.845	26.84	159.3	46.535	82.43	713.515	1191.735	46.93	84.48	319.2	89.535	225.76	12.97	189.165	182.29	365.665	1174.715	807.915	813.52	28.995	19.92	80.58	764.385	20.06	90.76	61.49	724.95	762.265	289.23
WBC from lupus	166.365	26.735	673.1	216.215	212.055	178.69	818.985	67.9	567.65	152.1	1396.565	946.985	266.58	286.985	664.275	1208.055	25.505	334.75	14.9	971.32	388.64	73.425	163.54	141.495	31.885	454.67	2013.385	30.57	99.23	933.3	29.93	147.23	106.025	83.7	146.67	233.65	1682.835	740.055	377.735	719.535	21.545	30.555	1833.735	152.085	115.33	237.915	980.86	1181.755	185.76
WBC from lupus	348.615	55.295	1019.995	47.62	92.295	38.385	320.755	2435.9	536.68	239.935	798.765	802.07	2538.245	134.135	1093.505	1531.34	715.185	100.705	12.83	443.335	99.1	231.545	164.465	146.44	559.04	256.865	800.05	33.89	84.33	253.605	173.68	230.97	77.655	108.585	175.34	297.615	1436.42	1236.42	872.165	20.725	17.17	232.575	1006.62	36.55	77.29	327.04	676.52	779.865	506.86
WBC from lupus	179.43	29.465	1947.745	60.345	101.885	148.97	348.375	2536.96	648.765	202.73	1020.485	845.15	2901.96	88.405	814.13	882.7	1464.885	197.565	13.145	623.01	187.675	274.92	126.66	183.46	394.03	413.405	1043.8	24.69	98.76	339.885	398.985	127.01	19.705	46.495	291.2	217.915	1604.9	750.015	457.2	39.575	15.555	245.31	1005.68	240.03	157.49	426.78	872.225	1065.96	326.93
WBC from lupus	430.795	51.455	1190.59	121.655	105.87	230.475	748.75	377.27	667.04	252.835	1122.215	951.335	416.12	216.36	1528.48	2225.765	887.93	142.615	4.715	699.825	201.765	251.155	237.475	193.505	502.835	216.335	1213.115	29.85	124.35	430.945	186.28	284.77	105.79	53.84	434.575	41.68	3111.615	1300.52	248.3	22.32	102.765	196.595	1014.055	111.375	185.445	168.925	960.215	1997.8	298.94
WBC from lupus	136.43	33.415	2890.115	68.94	24.8	530.095	449.54	1088.895	519.385	52.235	685.88	374.335	1284.885	99.755	783.665	473.815	1668.08	134.835	11.84	591.65	164.935	267.53	351.445	155.875	200.84	397.825	705.61	26.975	102.275	490.455	241.18	301.335	87.165	44.51	109.095	33.17	629.485	462.015	252.64	33.6	19.36	56.57	546.4	228.615	49.5	179.935	833.265	756.21	200.6
WBC from lupus	588.865	57.38	2062.735	86.28	168.505	138.375	430.72	2183.58	1042.79	456.54	858.75	669.27	5265.2	277.71	1041.365	1147.735	1116.76	76.285	5.74	407.325	155.435	151.5	192.385	44.135	246.29	578.055	775.28	27.005	78.075	321.015	89.93	268.565	15.825	288.765	176.595	277.995	1773.395	464.57	590.09	35.96	16.19	107.025	589.31	50.26	34.07	296.385	1055.855	1185.645	601.455
WBC from lupus	290.48	47.475	1620.845	15.39	52.29	75	83.605	2199.495	539.93	34.22	750.26	690.975	2244.75	94.35	818.96	1088.115	1149.545	123.65	7.235	587.005	227.015	239.69	166.345	123.16	96.35	336.235	890.785	19.04	147.815	246.58	136.68	211.11	85.355	241.59	269.915	63.71	1044.995	946.125	217.895	25.955	14.86	136.985	798.325	256.275	205.34	179.75	830.975	1381.535	246.475
WBC from lupus	284.87	31.625	2422.91	246.305	36.71	17.31	82.585	795.05	941.33	306.545	343.345	328.13	1209.505	67.705	368.45	1169.26	144.585	49.585	8.33	333.705	352.42	128.31	212.67	174.375	161.47	477.35	969.045	42.96	64.38	435.98	122.56	157.695	14.965	141.955	128.995	203.37	1513.775	681.325	404.195	56.91	15.255	67.74	1335.505	106.96	155.19	140.93	1122.465	1453.195	417.185
WBC from lupus	586.57	28.595	2530.19	129.57	51.62	86.425	70.925	295.48	1060.52	398.06	629.835	297.63	681.415	210.39	616.905	1539.39	152.8	62.63	64.27	479.26	281.97	121.3	272.645	62.28	38.955	417.665	668.96	29.005	210.475	420.04	25.035	85.56	17.475	166.915	311.03	21.07	1674.355	930.86	539.64	118.75	250.405	89.98	1089.505	73.235	43.785	469.005	742.225	856.38	144.16
WBC from lupus	214.98	31.35	1272.395	39.075	25.71	122.655	65.39	305.21	727.92	39.39	502.5	699.38	548.865	136.63	535.275	1014.295	138.315	33.835	7.045	357.875	172.99	42.155	15.545	137.755	20.44	238.445	767.23	24.235	11.985	339.705	96.765	38.25	77.65	147.28	77.845	138.88	1292.45	497.39	327.605	39.17	14.385	31.14	1407.34	17.525	22.92	231.775	495.295	498.52	224.845
WBC from lupus	211.82	24.415	1140.76	136.485	137.125	20.53	246.405	1865.665	1114.705	306.47	689.155	694.13	2214.655	176.865	510.225	1120.07	736.05	182.045	5.825	516.05	70.86	138.095	136.2	166.425	394.275	179.325	632.375	26.965	124.265	256.4	214.42	175.405	90.565	19.705	242.095	160.885	1230.85	532.405	383.415	106.86	15.525	37.09	1139.905	67.47	50.21	243.505	494.045	618.975	302.645
WBC from lupus	370.045	23.29	2344.745	20.88	202.41	68.48	56.785	575.22	1084.775	24.305	987.125	435.105	2339.25	296.74	870.29	1113.43	996.56	188.61	11.005	540.525	164.21	130.84	108.455	163.175	153.865	464.04	612.055	27.215	9.905	246.37	109.745	150.77	35.415	225.88	434.495	188.925	4019.17	1273.77	186.79	46.91	21.03	55.205	793.49	416.775	59.505	154.745	875.42	1241.15	201.14
WBC from lupus	705.83	78.24	2300.61	54.775	257.57	204.855	46.795	518.44	693.225	70.51	1044.145	434.49	993.99	391.055	1012.305	1113.635	1109.225	49.335	6.785	600.665	79.935	146.57	89.21	138.515	300.67	320.865	914.9	20.54	16.96	530.645	172.235	121.665	61.2	112.2	237.525	401.06	1675.34	670.295	591.165	47.98	28.52	87.64	1148.3	34.59	70.7	246.12	625.67	1421.365	423.23
WBC from lupus	645.385	33.2	1397.11	39.76	129.095	138.665	217.875	309.145	976.14	117.38	1200.375	449.295	1768.535	194.64	1323.1	1365.73	858.325	110.48	3.805	534.23	197.45	187.165	182.825	191.12	197.79	302.675	1093.9	25.805	110.05	379.92	184.915	199.82	80.095	101.24	211.885	256.45	1428.705	872.905	415.23	15.815	20.315	98.44	1213.9	136.73	154.15	18.81	716.71	1432.49	526.64
WBC from lupus	280.36	34.405	1346.085	156.09	146.26	122.335	102.93	391.64	601.97	126.91	640.98	610.61	439.815	324.56	710.52	1189.69	539.835	124.315	7.14	653.44	179.11	145.87	115.46	147.7	204.15	308.365	1160.73	15.15	105.375	519.54	138.59	179.25	86.975	164.695	124.095	129.31	787.17	407.315	319.275	24.77	12.45	40.315	1050.725	17.195	67.02	69.46	749.7	1236.23	231.25
WBC from lupus	47.395	96.205	1864.62	97.745	26.66	70.645	97.025	369.9	473.62	93.535	805.32	798.375	329.28	149.13	1364.735	1993.22	1090.745	155.43	2.85	545.1	182.16	209.87	110.625	132.035	486.84	341.745	1148.925	11.06	141.525	256.32	221.96	239.28	71.81	126.91	183.205	205.64	1546.295	880.17	411.095	25.245	19.19	101.65	1570.45	29.15	189.67	287.68	713.795	1421.68	382.85
WBC from lupus	168.445	55.285	2104.21	26.04	86.125	201.645	284.29	1030.21	490.48	113.53	649.815	473.12	1776.67	126.4	1016.215	1277.52	1096.17	45.015	4.505	631.08	73.1	109.285	170.44	175.59	424.245	270.715	673.82	20.72	10.52	195.205	258.14	252.125	80.18	84.435	100.205	296.8	1201.44	499.285	558.45	40.175	12.83	183.86	1213.585	32.735	34.79	158.47	604.995	839.315	144.58
WBC from lupus	358.535	28.98	1926.265	20.885	154.585	503.435	31.51	576.67	392.675	38.94	766.295	339.48	477.3	235.83	414.185	832.81	693.23	122.37	33.22	427.4	133.46	201.835	91.92	131.15	50.365	301.915	562.24	17.205	42.16	474.315	112.775	158.2	59.995	18.645	192.05	74.665	1446.245	509.105	324.2	22.76	14.19	46.125	695.88	114.98	62.13	220.745	649.095	982.095	134.035
WBC from lupus	61.805	31.39	2511.675	161.74	81.81	1036.85	289.535	865.66	482.14	93.12	767.47	195.955	1744.18	118.52	695.12	598.65	1876.26	143.12	5.725	628.75	169.545	144.175	178.51	147.85	360.365	355.185	919.85	34.925	93.33	351.225	281.06	190.98	71.795	203.73	100.285	155.925	753.36	452.86	225.485	32.21	43.93	48.895	483.265	143.26	27.85	34.07	711.405	413.54	208.1
WBC from lupus	31.25	29.465	2753.185	5.93	78.245	25.87	185.335	615.115	650.16	150.84	654.025	474.14	506.425	83.93	1056.935	1265.725	1968.47	91.485	2.735	395.435	94.935	151.09	198.35	204.42	619.065	223.78	727.36	22.04	93.56	195.725	346.725	291.045	60.93	137.025	233.865	250.205	1162.88	696.285	392.4	22.825	20.87	65.575	1117.355	95.89	155.085	179.185	855.51	1060.315	187
WBC from lupus	183.345	27.805	2618.615	109.875	83.815	83.055	234.115	778.425	658.415	415.475	641.52	811.78	802.285	142.44	1371.12	1525.32	1204.96	94.13	2.83	598.325	128.825	251.48	188.785	147.96	407.11	337.975	1495.145	18.09	132.32	268.09	275.155	278.685	61.035	130.77	267.31	343.57	1602.77	1101.38	472.415	81.13	28.1	126.65	1224.185	142.605	106.585	163.515	823.035	1588.93	382.035
WBC from lupus	150.09	28.015	2910.61	25.07	77.35	81.345	413.875	632.36	828.42	413.025	1008.665	897.57	1565.34	142.65	1479.495	1861.075	1481.04	29.13	3.29	482.315	136.745	208.945	223.735	202.88	372.005	285.435	1160.835	34.32	141.03	342	292.68	237.22	112.56	135.005	254.555	448.785	1835.865	1450.88	519.54	27.56	52.93	30.035	1274.365	213.43	180.2	283.44	1209.24	1779.06	419.265
WBC from lupus	32.25	24.955	2547.77	36.88	89.81	191.73	258.565	287.435	748.945	71.17	966.13	696.625	697.155	186.495	1712.595	1619.61	1022.955	202.615	49.12	656.3	99.435	298.96	149.155	170.23	535.135	183.655	1204.28	42.8	140.24	497.25	279.375	232.675	85.245	237.525	279.415	321.55	1459.11	1122.81	552.565	42.2	21	49.025	1430.435	25.14	162.665	86.985	1144.1	2113.535	365.69
WBC from lupus	667.055	25.3	2919.825	21.405	113.295	501.9	232.76	383.83	726.725	15.165	1288.3	516.41	756.115	278.155	862.235	1102.555	1101.74	26.105	4.235	604.915	80.07	115.785	105.95	136.455	407.61	319.185	644.16	17.445	54.44	284.665	174.705	105	69.15	74.63	155.245	160.54	807.68	583.855	208.71	37.405	21.61	132.105	928.625	118.835	20.62	96.75	661.4	852.17	193.285
WBC from lupus	299.045	74.85	1145.43	125.565	90.005	37.01	397.9	557.59	688.82	436.615	862.675	795.45	1383.945	140.015	1797.65	1539.19	610.755	57.83	58.47	697.15	168.515	184.58	294.94	171.385	419.455	368.235	1052.535	28.14	74.565	457.05	288.46	283.29	63.91	185.705	116.56	339.085	1222.395	706.76	498.91	107.385	28.235	88.645	1039.1	117.25	113.565	139.24	876.86	1387.535	376.49
WBC from lupus	306.56	28.23	2233.095	96.465	119.33	119.11	65.755	384.18	807.325	104.27	903.71	500.085	869.555	206.045	589.58	1253.88	853.675	175.45	5.18	628.99	138.54	142.105	118.765	79.435	445.885	328.9	949.105	27.76	89.4	430.37	238.795	223.78	78.655	158.375	193.015	218.26	1283.585	980.185	344.765	81.315	25.19	82.695	1224.345	88.05	94.445	184.43	805.16	1408.91	282.89
WBC from lupus	261.525	37.645	1667.135	97.46	98.9	103.735	25.275	845.14	559.665	251.52	549.615	628.19	2404.365	126.59	353.105	1438.15	627.155	67.845	18.66	478.76	45.99	121.855	70.255	110.115	359.835	243.495	628.34	25.175	84.765	69.15	200.55	249.255	13.055	104.265	179.505	124.535	1361.18	906.22	262.97	27.145	20.645	24.57	1205.715	17.725	42.7	29.485	575.83	708.87	251.65
WBC from lupus	450.915	36.005	4205.035	136.05	336.735	1527.595	57.56	414.835	1154.415	91.45	643.805	489.4	981.505	422.42	148.8	486.265	1957.36	40.245	2.025	569.8	172.82	116.17	128.665	184.165	332.605	384.685	545.765	21.445	50.07	476.685	261.505	162.52	76.39	27.445	84.875	33.49	596.575	301.065	181.335	36.67	18.03	106.99	739.305	12.13	36.805	113.925	569.075	522.115	91.775
WBC from lupus	226.025	16.165	1699.655	226.77	131.63	228.995	76.555	829.855	1014.875	45.705	510.665	673.255	2475.975	171.86	652.215	983.655	180.885	64.275	7.755	422.94	258.65	180.005	310.18	215.465	53.53	302.3	1025.315	21.34	49.48	876.84	151.395	249.5	8.21	71.275	167.505	296.94	961.685	612.29	597.33	130.945	46.47	80.52	815.27	164.26	33.81	55.115	738	776.42	205.51
WBC from lupus	880.475	117.965	2882.71	299.35	119.635	58.8	108.975	1627.49	1054.26	549.215	467.89	264.4	1663.415	332.225	94.75	1589.45	107.6	318.51	10.5	723.235	123.675	228.685	289.08	414.285	357.635	700.86	1249.335	62.985	125.99	494.025	87.31	212.705	46.83	74.115	157.345	509.515	844.46	380.81	584.41	1007.66	65.07	70.425	1144.825	107.08	171.82	237.885	1091.105	1399.675	371.68
WBC from lupus	313.055	26.3	2135.755	212.925	171.42	312.295	46.525	622.96	782.435	195.765	513.58	525.895	875.125	148.36	411.305	1264.72	453.605	24.865	4.345	473.25	129.03	56.43	356.035	161.48	151.81	409.9	945.705	25.1	6.695	657.24	139.965	210.83	171.11	30.035	175.1	179.92	860.97	750.685	420.935	92.215	26.905	388.675	900.15	30.71	34.01	228.725	763.66	1148.085	253.905
WBC from lupus	178.85	46.57	3001.865	21.195	180.85	134.005	250.2	442.83	701.665	405.205	716.965	406.02	451.12	271.855	1446.725	1191.73	1710.925	21.595	4.07	516.19	77.18	158.79	192.695	153.64	550.79	172.33	802.84	22.77	110.995	266.37	300.445	209.39	59.165	104.205	167.765	259.805	612.445	542.465	415.275	21.865	21.82	23.16	1212.06	241.365	65.04	106.07	788.265	1439.605	277.81
WBC from lupus	401.37	24.015	1440.955	108.41	81.81	30.025	154.925	521.135	574.285	15.06	794.02	418.05	1362.29	127.27	233.38	1313.44	857.975	146.43	4.655	522.81	126.495	151.9	127.555	160.095	477.61	214.78	1074.215	29.385	73.575	323.585	172.625	209.845	29.22	27.3	238.115	152.115	1219.66	1139.005	322.93	44.39	14.325	131.435	1008.9	90.515	118.355	343.205	755.005	1080.13	349.985
WBC from lupus	200.835	39.745	2088.84	33.54	135.145	39.64	243.005	635.295	833.715	119.155	780.275	315.865	556.535	137.715	1185.005	1031.495	1400.72	170.215	7.82	391.275	106.065	218.365	169.49	147.21	602.575	301.89	647.285	19.91	143.79	217.385	364.9	310.37	107.63	157.255	116.52	311.11	1567.21	638.68	504.535	23.92	16.42	117.73	1256.005	32.24	68.435	149.3	879.84	1157.62	250.48
WBC from lupus	421.625	43.255	1724.235	80.865	156.03	151.715	302.22	643.035	387.45	30.815	733.585	354.005	547.17	147.54	1341.375	1062.035	1439.81	25.21	2.865	323.03	63.29	147.7	114.465	81.095	571.175	261.165	727.15	24.25	72.515	353.52	277.895	227.77	45.9	105.485	156.285	52.7	1189.385	612.16	346.785	43.97	24.255	45.9	1059.91	56.195	91.28	123.365	789.605	1201.035	219.675
WBC from lupus	392.28	27.495	3623.765	11.77	128.925	968.175	112.48	633.655	884.46	178.49	758.805	299.805	1875.615	217.995	618.905	826.49	1741.665	87.09	1.71	564.625	71.16	130.175	111.28	102.625	623.785	225.035	672.685	15.905	51.755	254.735	339.92	44.51	54.04	184.475	146.355	371.735	599.155	436.545	528.14	20.84	25.57	29.43	805.055	28.94	32.07	118.715	527.61	671.805	173.395
WBC from lupus	182.735	28.615	2477.335	34.965	30.305	65.53	74.16	1038.76	586.52	288.215	743.575	749.05	786.54	91.89	1096.505	1105.99	1169.7	53.005	4.025	468.085	120.17	153.125	118.43	111.925	346.575	229.785	584.93	11.365	8.11	300.335	200.675	213.43	30.41	99.505	139.36	66.185	1006.125	479.865	267.48	18.91	10.41	66.985	559.555	31.685	53.345	307.53	552.905	894.41	166.85
WBC from lupus	242.73	39.81	2322.145	27.33	155.75	58.525	408.905	513.34	798.685	253.14	979.395	337.735	1973.76	194.365	1174.995	1589.07	1380.05	161.435	1.075	721.585	186.425	183.58	202.43	155.725	682.335	131.65	870.27	20.095	159.745	301.885	389.92	177.37	89.855	172.62	138.155	373.21	1218.67	648.34	536.965	48.88	18.195	86.285	1110.23	43.43	141.435	147.285	849.68	1171.815	321.645
WBC from lupus	144.055	22.93	3307.53	18.48	91.875	858.325	118.435	919.125	947.205	86.69	491.16	560.9	622.97	164.725	1188.86	678.48	1540.69	160.595	6.35	391.895	69.205	88.62	107.05	206.675	270.63	79.63	516.97	12.295	70.515	482.63	224.315	219.73	65.43	12.105	137.185	49.21	802.21	663.15	423.875	39.745	16.525	31.53	703.015	21.52	35.53	185.23	650.84	629.985	92.34
WBC from lupus	440.505	36.15	2601.84	30.175	384.355	1248.64	90.485	628.425	994.68	24.2	1502.625	396.07	471.545	393.71	841.83	722.765	1536.585	71.115	3.3	677.69	150.565	87.375	109.935	159.845	412.51	220.515	719.575	25.96	86.615	534.09	363.7	127.135	97.25	127.4	160.99	18.445	884.11	561.435	120.18	19.705	19.535	41.145	639.265	29.15	33.26	195.48	617.285	431.135	38.23
WBC from lupus	179.61	34.755	2372.63	94.17	13.485	283.71	210.55	864.565	748.31	237.485	721.32	461.89	488.23	156.385	937.085	1177.015	999.82	55.005	13.215	830.49	94.925	181.94	141.965	153.165	520.84	296	1006.32	20.99	47.54	352.395	218.495	234.21	57.485	106.055	195.25	69.225	1275.695	924.075	241.77	60.365	20.185	139.985	1116.495	75.435	83.74	267.41	716.7	1022.41	330.7
WBC from lupus	16.33	51.91	1710.205	124.925	16.33	174.5	187.09	433.74	615.355	335.59	740.175	609.02	1036.475	79.58	1152.59	1799.65	1068.49	53.03	2.28	616.73	160.195	246.505	196.51	117.575	284.405	200.52	1037.95	32.35	101.66	400.14	268.59	207.42	61.505	125.1	221.28	293.705	1808.23	1280.97	447.345	35.37	30.875	115.145	1495.06	97.955	117.27	266.31	941.045	1189.555	629.115
WBC from lupus	554.02	52.88	2375.31	32.505	173.62	159.535	74.005	877.435	1196.275	342.44	911.6	558.375	3650.84	147.045	753.87	1243.05	1384.185	56.81	3.28	407.155	142.22	164.315	102.945	103.83	458.645	251.915	1005.28	15.11	132.87	445.405	149.38	114.45	57.545	40.12	175.27	217.77	1009.48	608.3	512.56	69.65	15.97	64.93	1316.865	37.22	141.63	78.86	594.995	824.99	468.41
WBC from lupus	297.4	170.625	1698.905	22.89	17.875	85.69	331.695	447.41	234.5	134.155	482.475	894.825	1176.265	120.035	790.27	1446.215	439.75	90.73	5.175	364.655	69.995	121.415	182.34	135.31	100.915	390.49	891.815	26.125	63.94	288.6	40.225	233.195	27.79	27.545	293.885	344.26	1906.31	1339.985	643.43	30.58	55.12	46.645	1067.245	43.11	118.09	250.105	602.7	819.715	431.005
WBC from lupus	190.45	20.42	1772.015	52.535	80.765	38.92	124.765	1022.75	705.04	46.06	604.995	773.355	2089.025	116.17	1329.805	1239.665	873.505	188.65	1.945	657.135	57.035	216.925	183.605	135.085	253.265	273.145	1015.735	18.6	86.865	288.095	74.065	183.125	33.765	54.685	217.77	400	1106.025	903.375	1024.67	229.82	33.03	132.62	1044.67	48.85	100.865	147.725	910.345	1226.705	316.465
WBC from lupus	335.83	26.23	1490.765	91.9	121.605	35.695	51.17	605.635	776.525	166.75	590.175	708.45	1869.42	154.52	791.865	1053.38	680.605	162.72	11.37	547.245	91.575	169.93	180.245	205.55	182.815	386.25	757.9	19.67	34.52	383.925	60.17	207	52.295	187.455	222.925	184.16	1750.8	908.055	348.985	22.88	15.3	42.175	841.725	15.14	65.96	27.96	778.105	933.475	292.44
WBC from lupus	150.515	25.95	2127.135	60.675	40.64	64.42	366.765	665.205	517.72	272.11	622.53	625.35	425.175	127.3	1104.39	1511.54	895.135	170.53	4.91	544.53	115.325	188.28	245.29	157.755	357.67	318.69	1098.56	27.52	115.92	330.745	155.59	254.09	64.545	170.59	91.285	133.31	882.445	642.79	555.815	30.85	19.545	48.185	1357.09	80.685	37.515	140.785	988.34	1112.05	356.96
WBC from lupus	455.625	26.565	1041.785	18.075	277.175	540.975	49.65	739.905	1138.865	68.295	1214.925	489.675	911.54	276.58	449.025	817.57	752.215	186.49	41.14	532.035	170.585	40.31	205.14	212.725	300.265	366.51	636.555	28.515	85.19	193.63	170.38	276.87	63.605	161.675	73.795	177.955	885.54	418.895	392.02	24.68	21.03	177.54	851.145	37.595	35.385	60.93	715.63	714.54	144.025
WBC from lupus	217.88	17.03	1764.795	159.515	62.84	309.315	89.655	426.105	744.095	21.795	746.145	322.695	1176.82	163.235	540.935	782.055	1267.425	56.985	5.855	418.545	231.18	106.27	229.745	191.215	156.16	277.715	867.705	23.455	45.41	560.13	186.135	191.725	24.585	148.195	32.215	471.055	617.475	425.17	719.185	38.07	16.155	43.05	803.695	12.945	16.875	209.72	653.01	536.845	116.765
WBC from lupus	13.9	23.1	1430.385	104.695	46.815	76.08	100.115	1018.175	623.885	96.38	705.93	532.735	946	95	752.86	1471.835	1110.27	219.06	2.97	669.395	157.225	268.7	119.135	103.965	646.425	339.04	1491.38	14.62	160.46	278.04	204.44	196.81	52.765	261.1	266.08	198.83	1650.375	1117.995	403.33	22.46	15.425	156.63	1333.55	56.605	119.28	162.68	906.605	1020.05	340.47
WBC from lupus	246.775	87.55	1912.06	57.735	22.065	110.83	587.19	721.02	629.43	607.79	854.29	708.305	925.72	84.615	1454.775	1857.215	1060.83	146.11	1.82	840.41	149.75	240.325	94.505	117.59	376.315	300.805	1262.585	33.03	167.52	352.4	157.375	158.875	28.38	233.26	261.745	481.98	1410.87	1026.115	865.645	35.535	25.27	210.715	1663.695	116.72	180.49	213.9	836.815	1036.045	463.72
WBC from lupus	211.325	35.075	1786.855	118.465	80.245	152.44	662.905	247.885	687.385	439.025	967.915	596.025	331.275	177.305	1409.15	2104.92	952.77	55.635	2.71	631.695	140.145	294.495	146.57	145.855	544.95	120.89	1407.835	32.405	168.4	312.945	207.175	163.88	53.215	115.13	279.84	416.235	1221.825	848.34	737.37	23.665	18.53	39.055	1477.395	89.97	109.515	131.11	966.59	1232.875	533.105
WBC from lupus	148.12	82.615	1339.105	177.125	57.615	168.81	580.965	265.66	530.11	559.885	1070.425	551.31	235.55	204.36	1469.77	1971.735	855.545	42.445	10.9	392.015	93.655	231.405	144.875	102.59	443.885	169.27	1330.655	66.64	188.34	461.715	230.86	142.675	55.735	105.98	278.645	374.78	1705.44	965.745	905.2	27.455	28.99	188.47	1500.525	25.14	170.415	255.185	1017.885	1286.635	477.44
WBC from lupus	203.395	40.975	1338.775	34.33	172.85	267.245	398.805	696.245	896.33	240.31	1193.725	558.835	522.52	229.185	733.085	2220.195	895.105	431.955	10.96	468.725	126.245	232.215	155.01	116.23	85.815	381.485	1578.695	80.925	196.475	442.175	145.445	270.675	20.05	275.47	96.79	423.44	984.12	706.285	814.95	43.635	22.36	377.51	1199.34	42.005	164.22	172.49	1017.23	1273.605	558.745
WBC from lupus	238.18	23.005	1181.715	29.445	208.41	87.15	50.07	450.76	866.01	95.345	610.33	658.77	418.49	279.8	625.46	1517.48	547.43	143.715	11.535	495.065	110.62	75.83	139.145	185.555	388.365	192.585	573.555	33.28	95.105	353.865	105.925	150.96	24.06	153.515	81.12	148.69	721.89	391.61	286.39	79.705	18.22	52.86	1046.97	11.295	36.855	151.83	708.5	394.47	79.52
WBC from lupus	575.545	28.52	2100.97	73.2	147.175	118.69	58.35	723.415	671.765	191.165	999.835	610.255	2167.045	209.165	718.595	1079.745	774.44	23.41	2.26	646.175	78.89	142.98	83.21	98.085	361.545	343.73	1051.165	29.94	52.075	317.905	112.945	114.01	21.545	195.295	103.41	92.995	604.695	325.955	162.88	30.485	21.165	55.31	587.035	19.865	103.935	354.21	564.835	880.785	223.975
WBC from lupus	336.79	69.445	1490.53	42.88	47.845	195.795	277.535	415.555	608.49	142.725	605.905	363.085	688.51	243.735	345.145	1099.925	436.845	85.985	75.99	266.26	101.305	164.72	171.17	153.33	386.075	190.19	844.775	18.17	86.805	469.575	98.42	131.04	119.465	225.23	133.77	117.33	923.1	597.91	446.81	45.395	13.86	35.315	686.86	26.18	9.97	201.42	483.53	854.865	71.85
WBC from lupus	254.075	183.9	3059.315	112.87	171.745	96.83	287.31	676.595	646.77	216.09	928.83	1266.66	924.7	144.72	1000.08	1762.79	729.695	106.17	1.435	563.45	152.185	214.62	90.975	78.84	193.655	144.2	910.64	24.92	120.495	461.435	144.855	209.84	43.855	80.935	236.695	162.195	1498.655	821.09	243.71	88.325	87.675	56.185	1241.59	101.2	235.355	313.73	529.405	1375.38	508.65
WBC from lupus	696.485	24.635	2279.6	137.115	28.405	118.28	80.105	1002.045	726.515	34.125	747.41	622.675	928.485	138.275	874.19	1775.795	251.33	290.795	41.5	519.475	190.075	77.28	159.085	144.595	50.205	429.64	845.245	16.835	130.625	341.96	93.545	146.27	76.77	224.805	124.74	329.01	1774.705	747.84	658.255	46.235	11.995	197.21	686.53	19.645	40.185	240.11	594.105	1092.555	278.435
WBC from lupus	258.775	71.635	2041.25	143.41	42.345	158.62	537.87	396.595	496.065	909.455	633.04	687.69	1206.225	131.815	1423.325	1720.72	379.495	72.26	20.365	354.285	94.35	133.04	224.64	79.02	54.36	257.66	1220.05	87.92	72.53	200.76	37.23	189.635	53.315	32.21	200.235	355.68	1047.935	612.665	547.79	26.385	11.515	50.44	1303.42	55.2	21.075	317.17	762.39	1486.735	533.85
WBC from lupus	248.07	24.43	3148.52	20.01	22.165	29.06	315.105	1035.82	1059.725	60.715	447.795	365.665	1987.605	116.56	851.215	1100.175	1149.015	91.525	8.44	516.375	45.14	170.695	248.535	224.19	76.71	481.205	691.67	20.74	78.53	420.515	29.79	298.515	28.21	53.135	50.435	620.185	773.18	525.475	1407.745	33.465	19.115	51.935	1062.85	26.8	35.3	37.33	588.3	709.475	276.85
WBC from lupus	17.195	49.66	2044.035	190.21	161.78	58.92	114.815	1330.565	763.815	498.21	464.71	395.83	1213.075	156.76	1026.24	1619.075	645.185	204.535	3.305	732.945	140.855	107.045	163.715	195.88	92.105	461.77	1068.56	26.195	49.15	641.635	136.12	24.505	75.88	184.93	90.615	321.615	629.685	610.77	314.425	23.6	29.415	82.025	1115.77	19.785	103.11	130.015	695.56	1023.685	444.34
WBC from lupus	351.44	28.185	3435.395	31.255	125.735	96.5	51.16	748.1	829.64	322.86	1014.665	332.765	2664.51	223.59	935.975	983.435	1448.03	70.5	6.935	606.395	135.76	266.47	141.245	289.88	355.705	294.165	863.705	31.15	46.555	408.005	200.4	164.8	69.56	222.255	162.67	33.995	1890.005	927.77	137.175	28.575	27.06	19.875	744.3	110.135	91.835	266.1	861.73	1053.26	134
WBC from lupus	153.17	43.76	2060.535	12.075	42.75	43.25	183.41	966.455	958.145	213.27	609.205	358.115	1706.91	193.345	1048.135	1476.895	1568.08	232.245	5.115	908.03	262.685	147.05	213.065	176.75	472.615	495.775	724.185	28.795	48.155	317.59	586.83	328.725	87.1	63.51	96.665	72.05	880.73	597.86	365.625	38.275	27.185	67.26	1123.95	29.295	52.28	227.75	944.93	1045.355	144.49
WBC from lupus	335.605	17.42	2176.105	179.625	228.38	124.57	321.36	1255.82	879.725	468.12	307.03	475.755	1790.185	331.995	960.755	1639.655	768.515	152.975	9.925	557.995	110.055	142.57	208.15	219.295	45.585	325.445	1429.87	33.625	8.07	631.43	59.405	37.385	90.2	77.7	204.135	500.36	1081.735	1167.13	1435.935	181.535	25.285	54.42	989.93	33.745	34.265	146.475	941.48	1973.69	297.285
WBC from lupus	437.285	20.28	1537.22	94.505	104.19	114.41	846.635	1105.095	663.115	333.32	422.085	565.22	4098.885	209.795	1096.885	2129.625	191.5	23.93	6.105	299.545	88.035	104.06	244.395	111.04	29.035	276.33	1065.76	50.695	46.915	239.13	18.015	153.995	21.59	165.16	201.755	688.855	1430.715	775.685	1654.145	65.97	8.87	132.64	1342.805	10.005	22.4	397.99	588.54	1664.54	644.305
WBC from lupus	386.15	38.89	2983.83	19.315	175.84	963.215	87.3	733.655	448.955	78.1	859.165	161.41	892.555	463.325	367.885	730.98	1960.695	354.045	5.36	677.92	56.835	169.78	153.875	268.97	88.425	433.505	927.69	37.68	25.775	389.915	186.24	63.68	18.175	265.52	90.705	45.75	536.405	411.84	95.23	59.58	13.965	56.665	501.375	25.67	41.25	50.135	692.24	649.195	110.61
WBC from lupus	121.045	61.375	3926.295	119.15	142.055	108.975	142.075	1381.845	1134.66	587.93	650.86	402.3	2405.725	158.14	1466.38	1396.25	1463.01	292.93	6.385	577.44	280.34	253.49	285.45	262.165	171.95	430.875	1665.995	30.325	102.19	365.185	172.33	178.35	127.525	138.625	252.97	411.99	1624.745	1518.975	392.87	37.555	29.175	111.285	996.34	112.45	138.72	241.955	1007.385	1545.665	408
[truncated: 310 more columns]
